# Supplementary material for: Seedless synthesis and SERS characterization of multi-branched gold nanoflowers using water soluble polymers
Source: Royal Society of Chemistry journal article supplement (doi:10.1039/c7nr01233k), 2017-01-01
Supplement: c7nr01233k1.pdf [file c7nr01233k1.pdf]

**Supplementary information**

**Seedless synthesis and SERS characterization of multi-branched gold nanoflowers using water soluble polymers**

Victor M. Kariuki<sup>†</sup>, Jason C Hoffemeir<sup>†</sup>, Idris Yazgan<sup>†</sup> and Omowunmi A. Sadik<sup>†</sup>

<sup>†</sup> \*

<sup>†</sup> Department of Chemistry

Center for Research in Advanced Sensing Technologies & Environmental Sustainability  
(CREATES)

State University of New York at Binghamton

P.O Box 6000 Binghamton, NY, 13902-6000

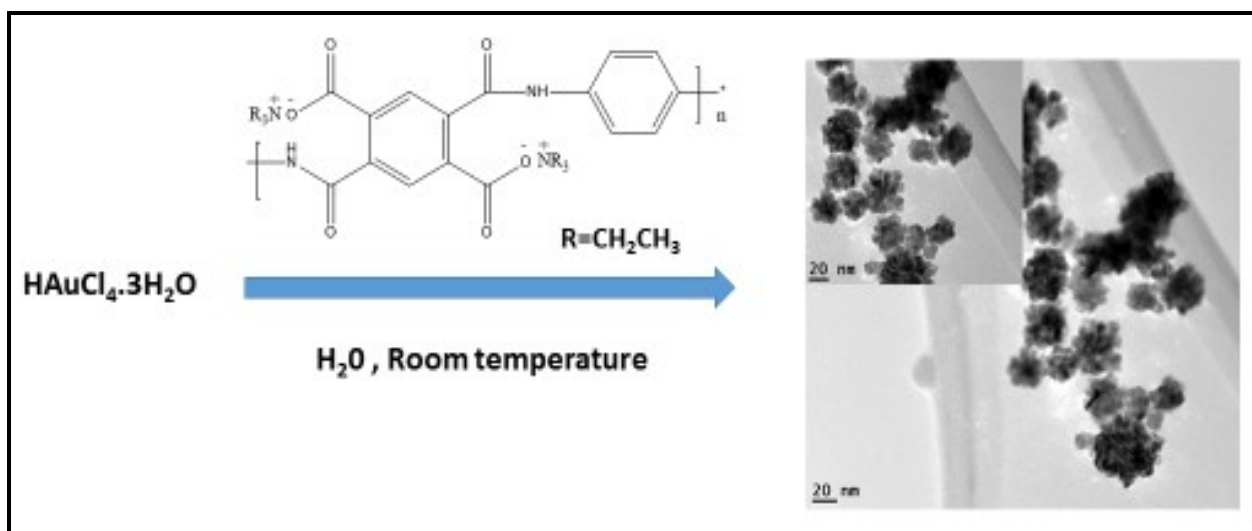

**Figure S1:** Synthesis of AuNFs with PPDDs



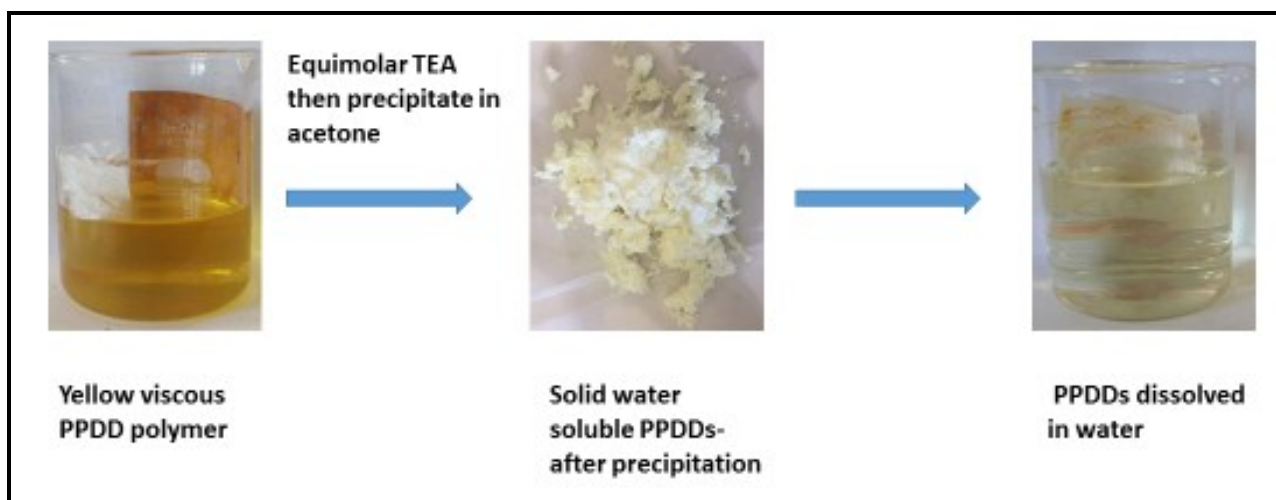

**Figure S3:** Digital images of the appearance of PPDD polymer, PPDDs in solid form and PPDDs after dissolution in water.

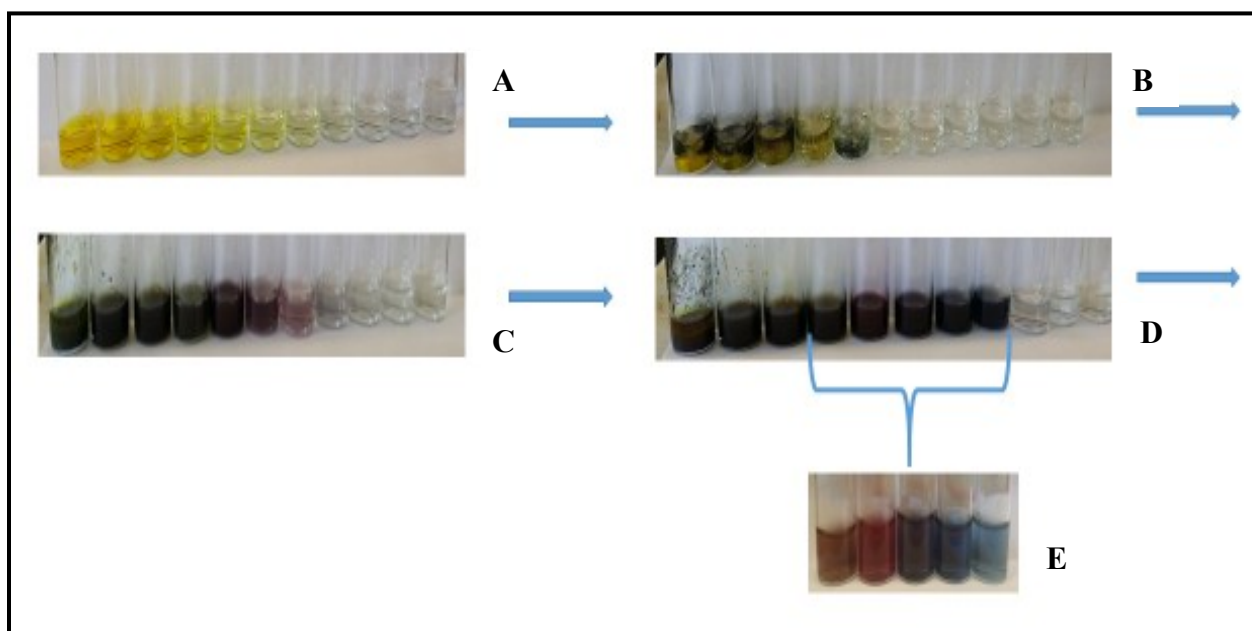

**Figure S4:** Schematic showing the synthesis of AuNFs using water soluble PPDDs-**A:** Serial diluted solutions of  $\text{HAuCl}_4 \cdot 3\text{H}_2\text{O}$ , **B:**  $\text{HAuCl}_4 \cdot 3\text{H}_2\text{O}$  solutions mixed with 2ml of water soluble PPDDs, **C:** Nanoparticle (NP) formation after ~2 minutes **D:** NP formation after ~6 minutes, **E:** Final NP solutions

**Figure S5: NMR Characterization of PPDDs**

**$^1\text{H}$  NMR PPDD polymer**

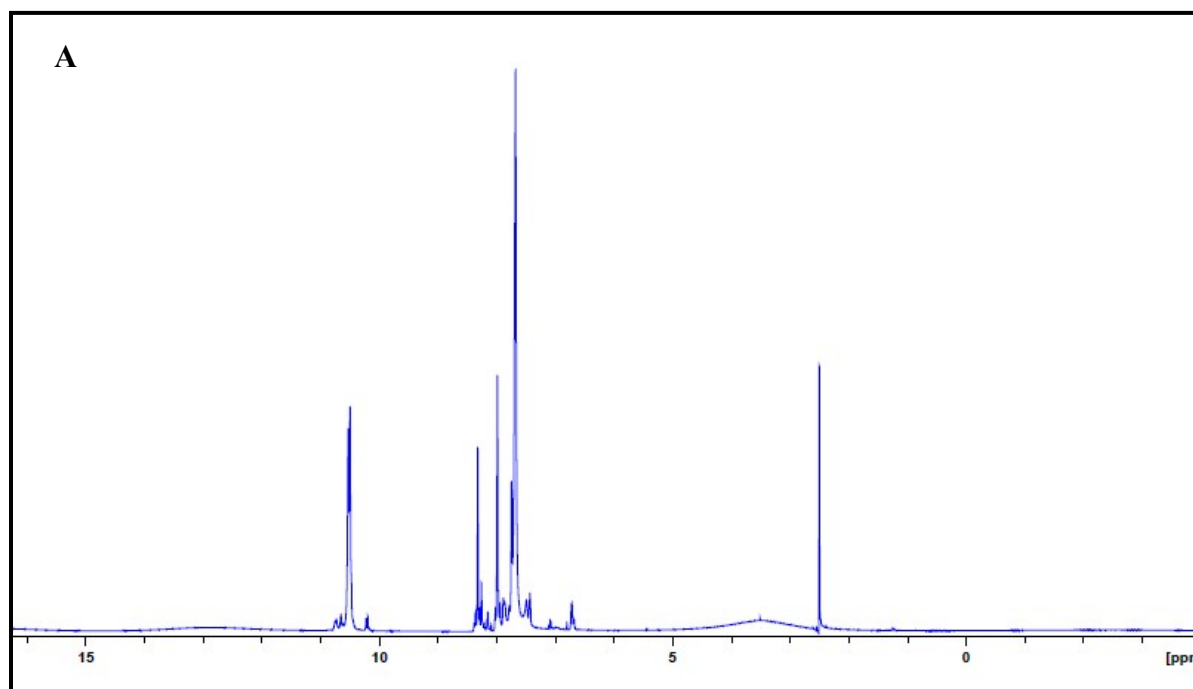

**$^1\text{H}$  NMR PPDDs-water soluble trimethylamine salt**

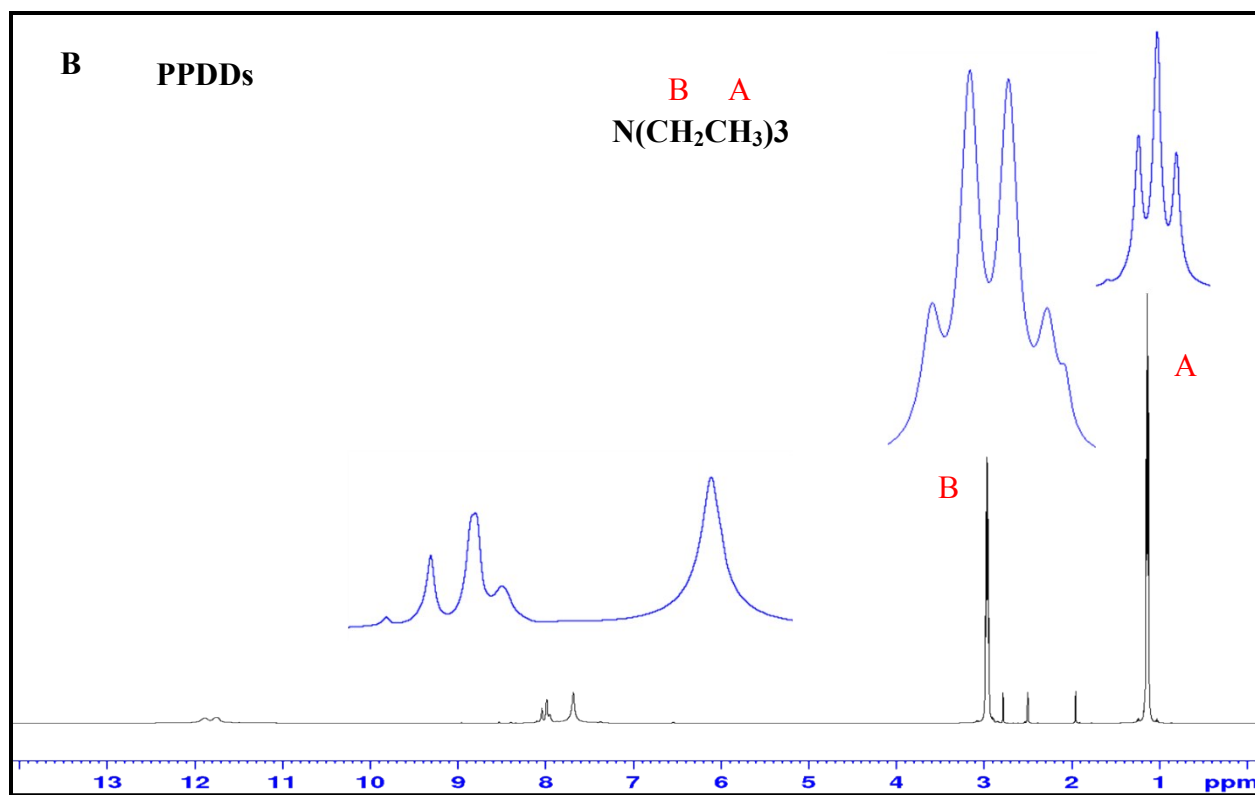

**Figure S6:** Additional TEM images

6.25mM

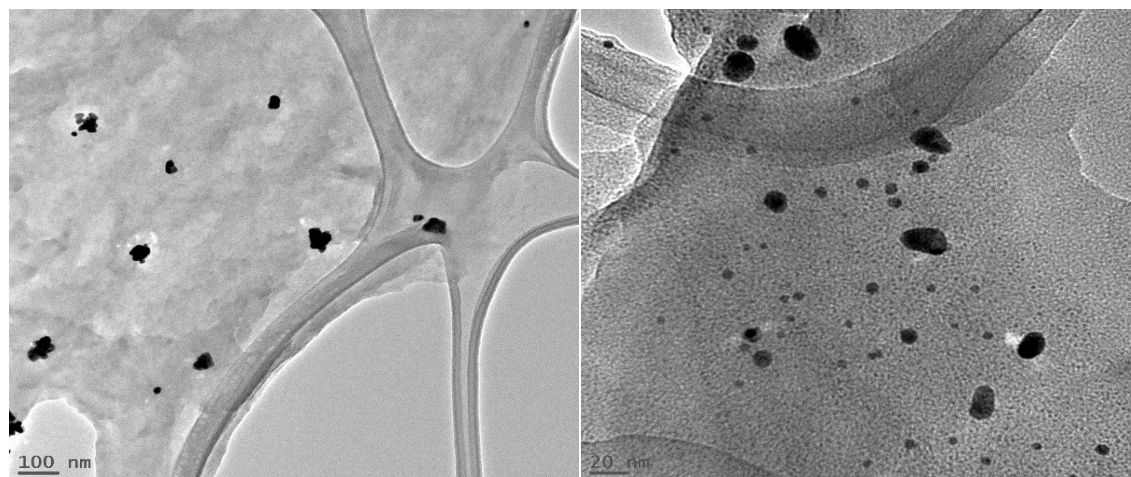

**3.13mM**

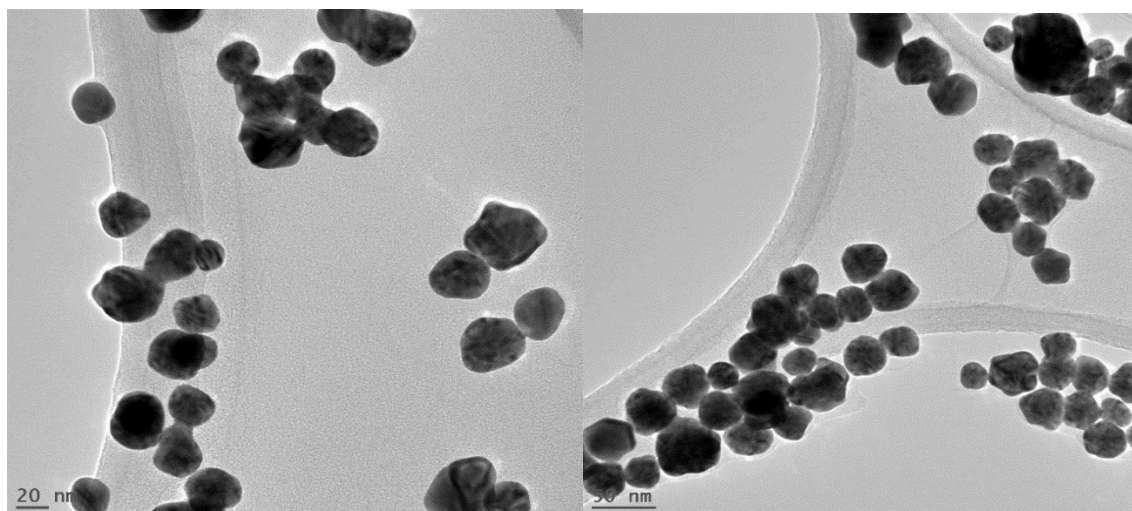

**1.563mM**

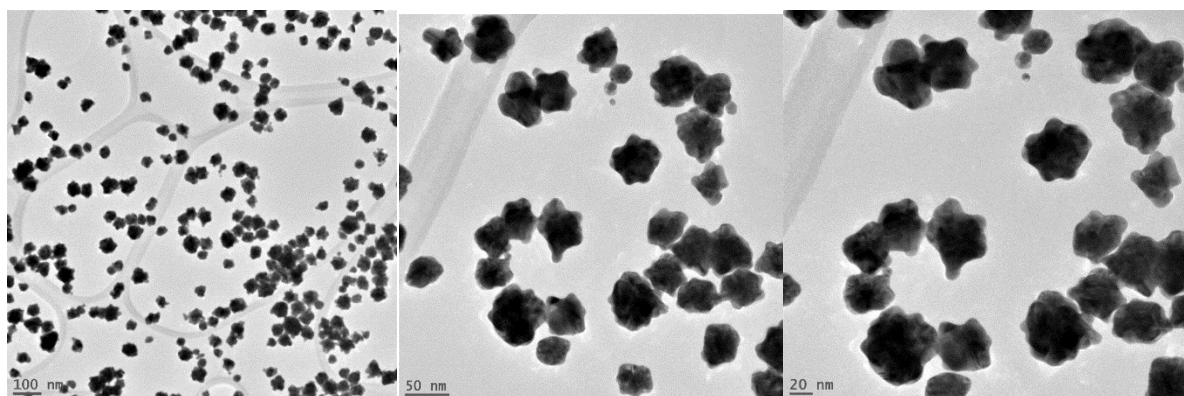

**0.781mM**

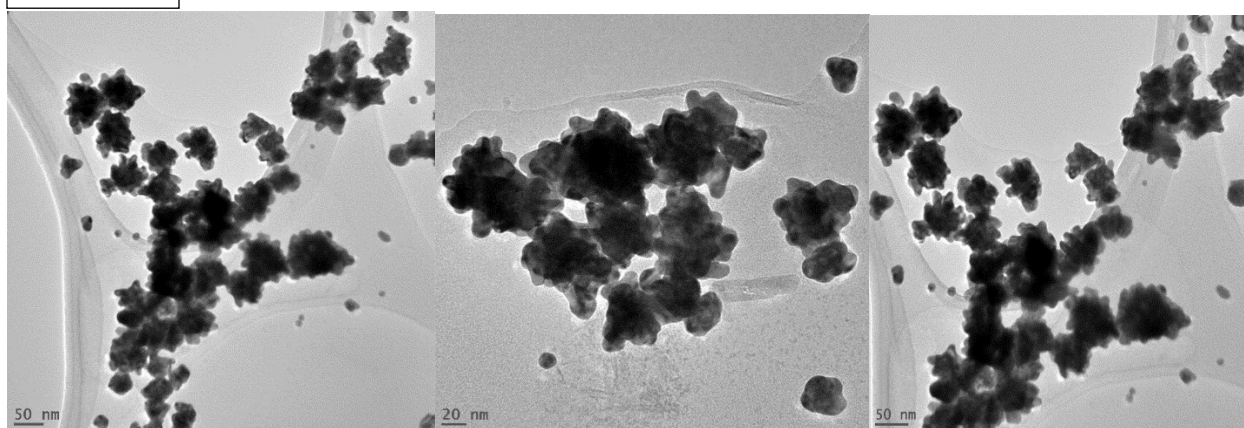



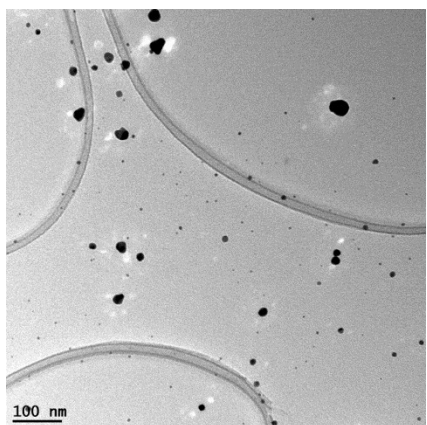

0.391mM

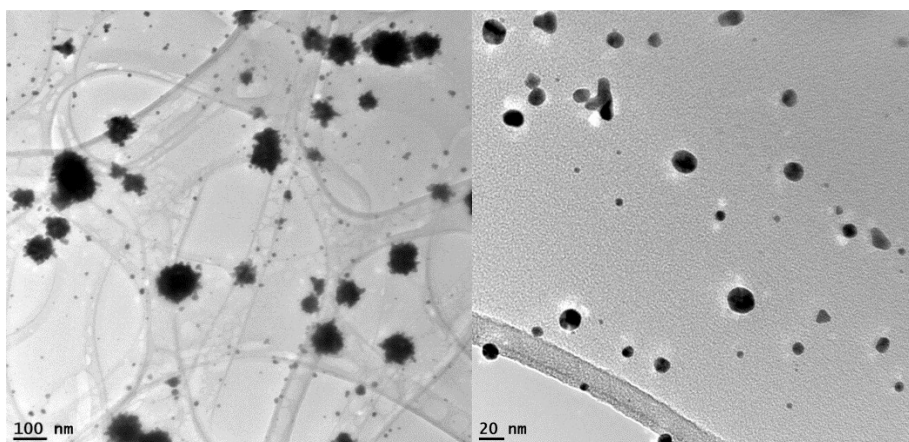

Figure S6-Trend of Nanoflower size versus gold precursor concentration

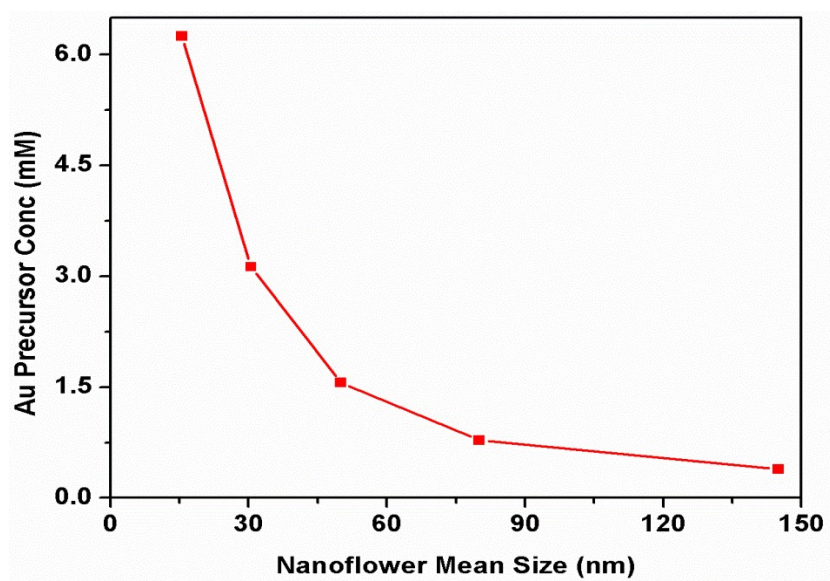



**Figure S7: Effect of PPDDs concentration on the size and morphology of AuNFs.**

**S7-A:** In 0.4w/v PPDDs

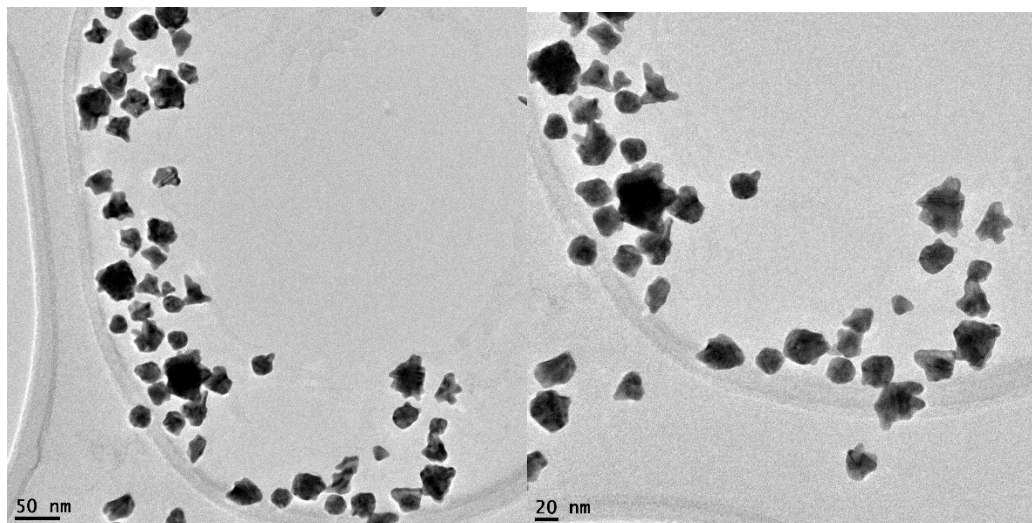

**S7-B:** In 0.2w/v PPDDs

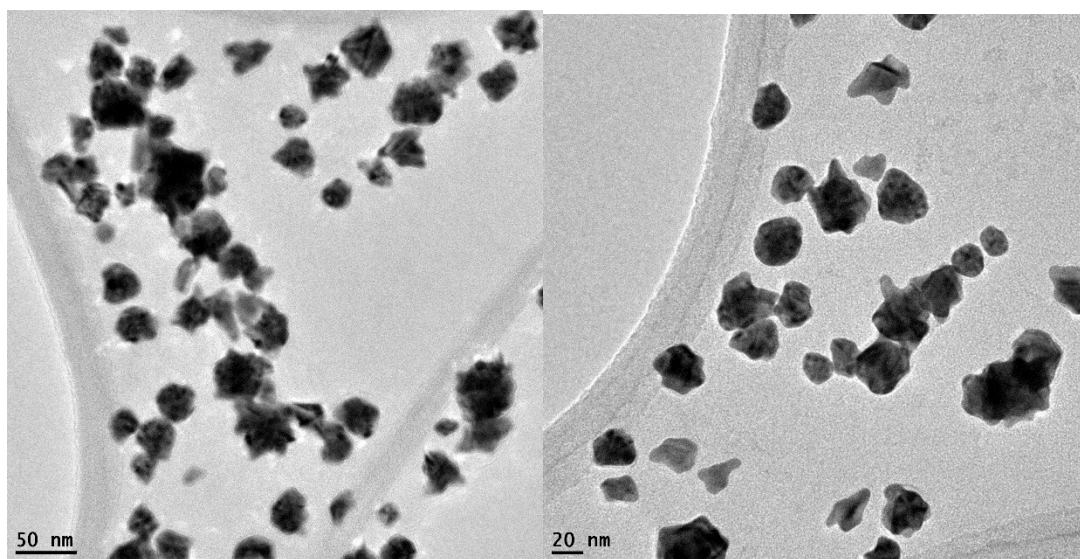

**S7-C:** In 0.1w/v PPDDs

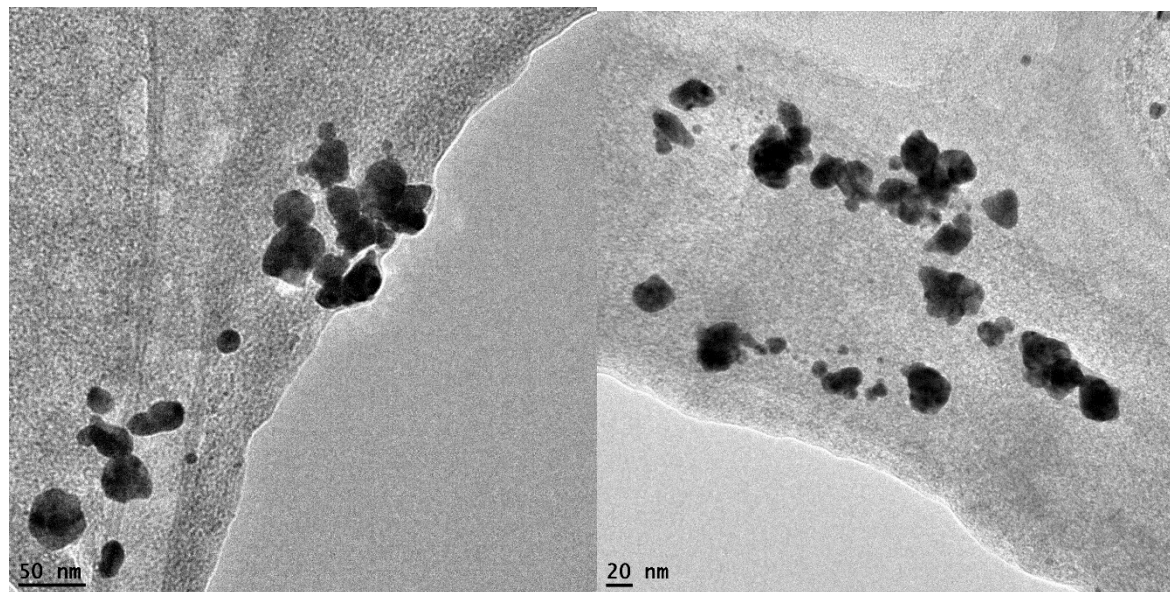

**S7-D:** In 0.05w/v PPDDs

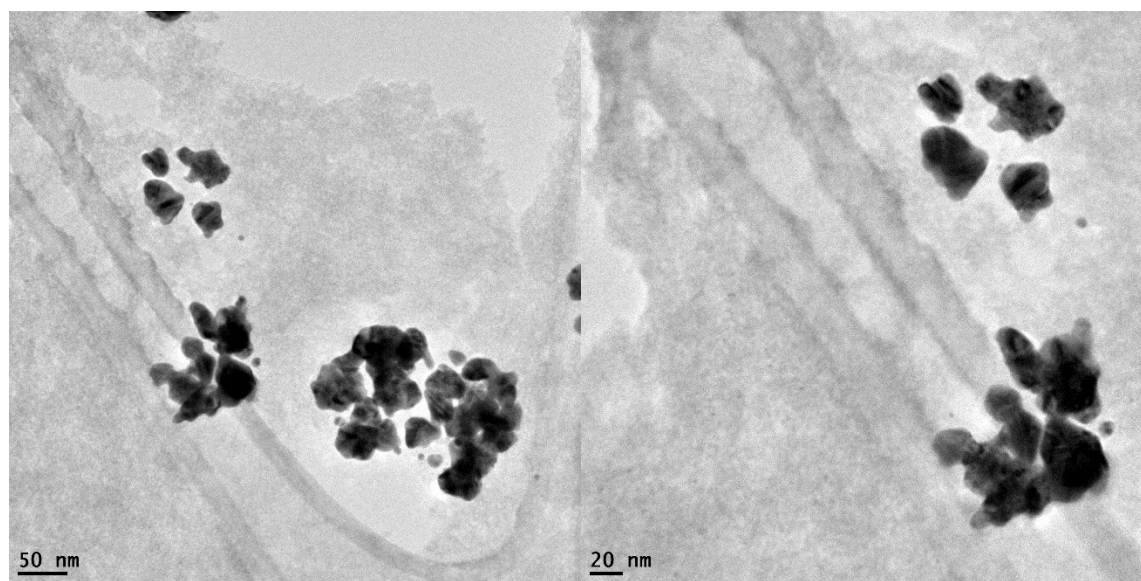

**S7-E:** In 0.025 w/v PPDDs

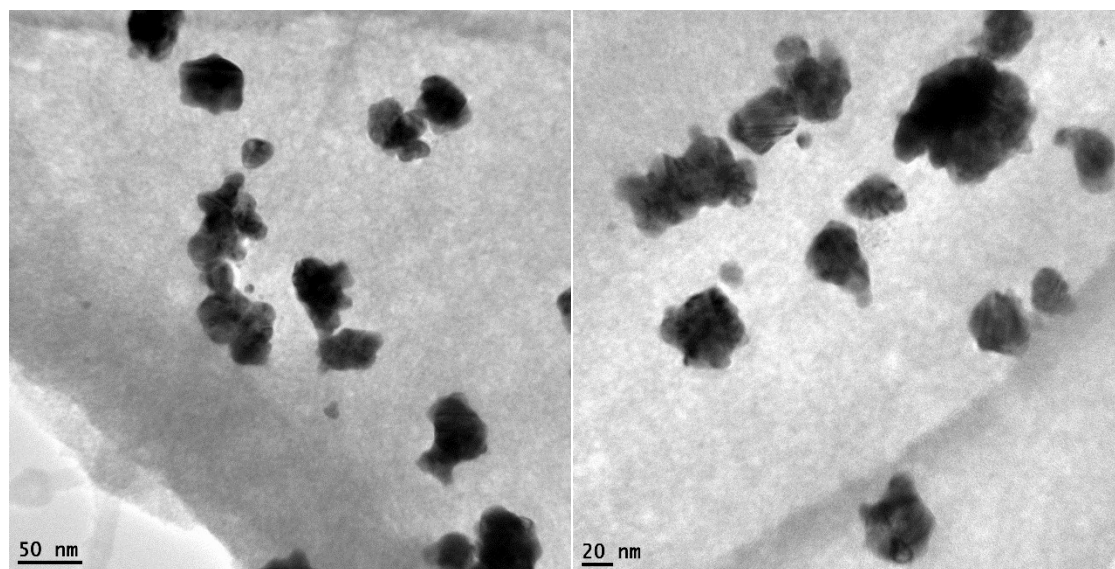

**S7-F:** In 0.0125w/v PPDDs

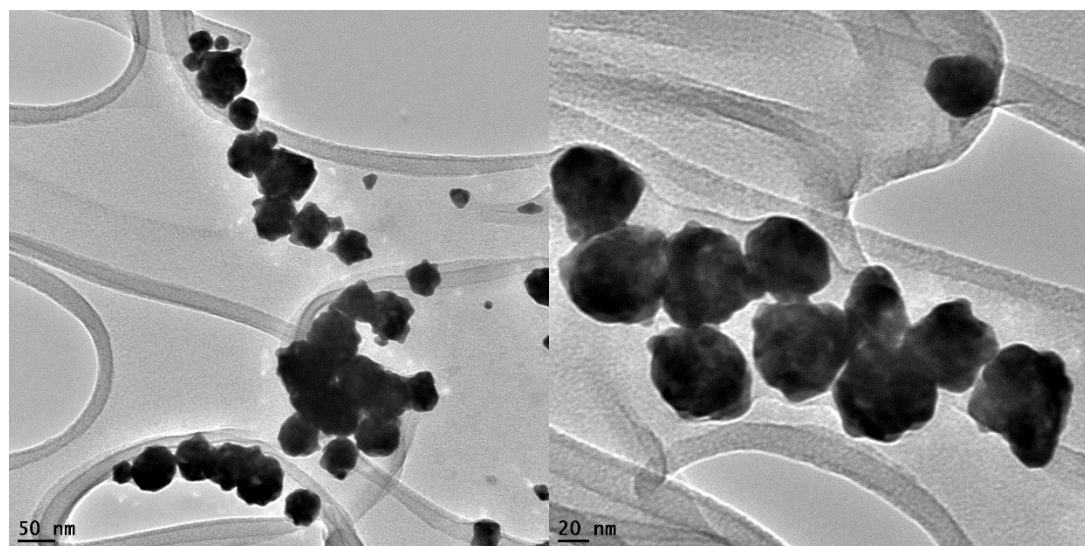

**Figure S8:** Effect of Temperature on nanoflower morphology-50 Celcius

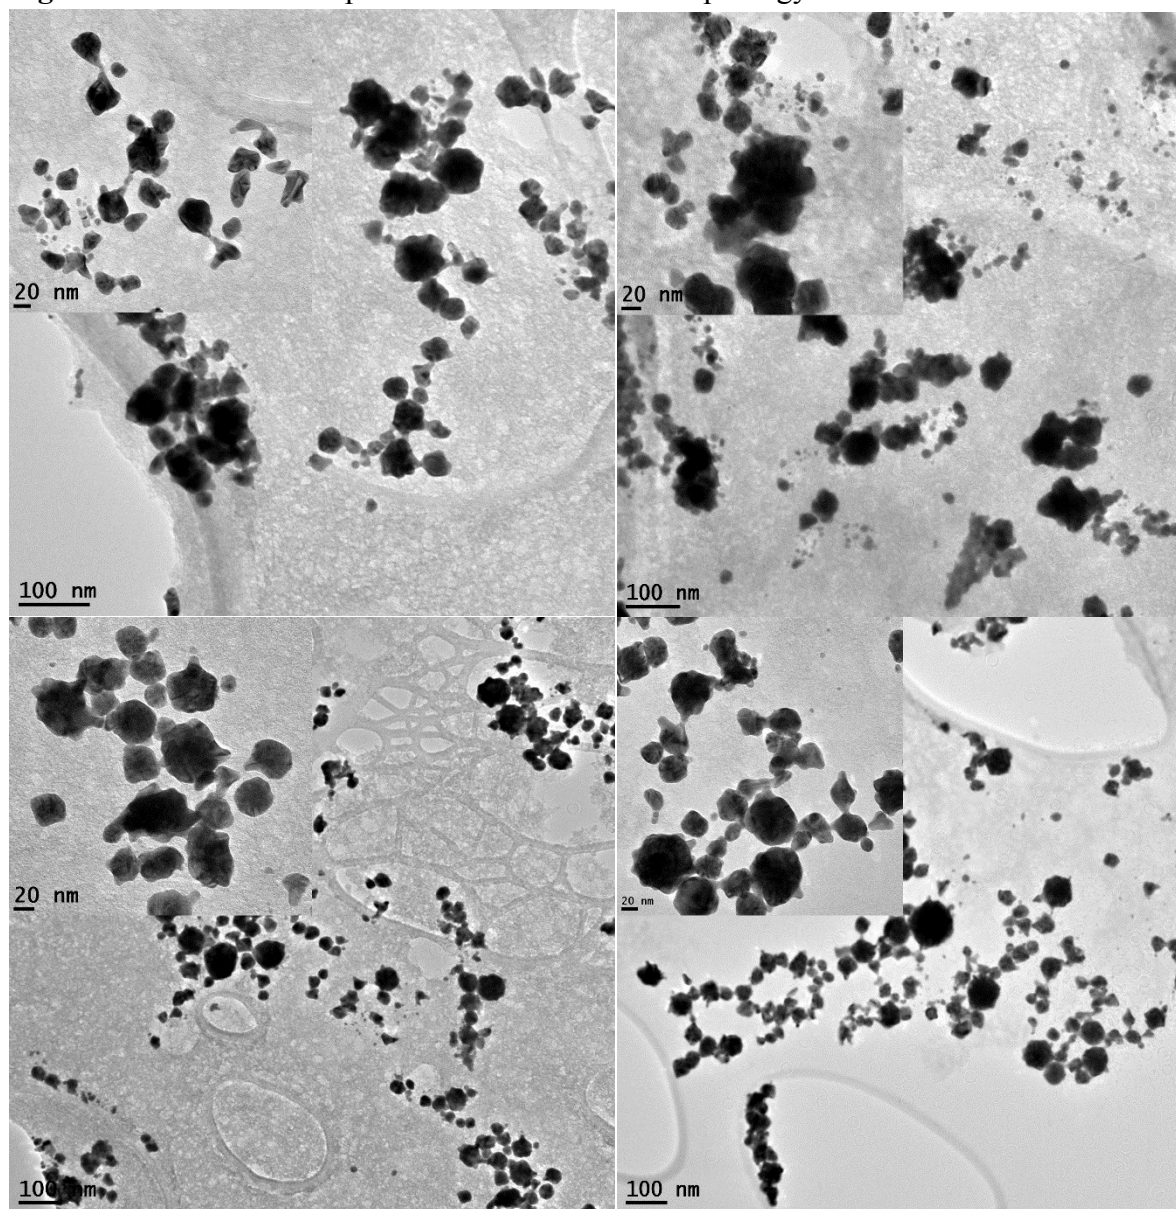

### Section S9: Enhancement Factor Calculations

4-MBA standard in EtOH:  $I=29284.375$  at  $884.375\text{ cm}^{-1}$

4-MBA: **2mM**,  $1.2044\text{E}+24$  4-MBA/mL

The enhancement factor is estimated on the basis of the relationship:

$$EF = \frac{I_{Sample}}{I_{RL}} \times \left[ \frac{(RL/cm^3)}{(NPs/cm^3) \times (RL/NP) \times \theta} \right]$$

\*\*\*Unless you finish the equation, you should use the ratio of intensity to estimate EF\*\*\*

where,  $I_{sample}$  is the Raman intensity of the assembly solution,  $I_{RL}$  is the Raman intensity of the standard Raman Label (RL) solution,  $RL/cm^3$  is the number of RL molecules dissolved per mL ( $1.02 \times 10^{20}$ , 0.17 mM),  $NPs/cm^3$  is the number of gold nanoparticles per mL,  $RL/NP$  is the number of RL molecules in 1 monolayer (39-nm:  $1.6 \times 10^4$ , 62-nm:  $3.9 \times 10^4$ ), and  $\theta$  is surface coverage of RL on the nanoparticles.

The ratios of intensity are referred to as Analytical Enhancement Factor –AEF.

AEF was calculated by means of the following expression<sup>71, 72</sup>:

$$AEF = \frac{I_{Sample}}{I_{RL}} ;$$

|                    | <b>884.375 cm<sup>-1</sup></b>             | <b>1092 cm<sup>-1</sup></b>                   | <b>1480 cm<sup>-1</sup></b> |
|--------------------|--------------------------------------------|-----------------------------------------------|-----------------------------|
| <b>AuNF Sample</b> | <b>I<sub>sample</sub>/I<sub>4MBA</sub></b> | <b>(I<sub>Sample</sub>/I<sub>4-MBA</sub>)</b> |                             |
| 6.25mM             | 0.31309373                                 | 3.7709E+23                                    | 0.1496241                   |
| 3.13 mM            | 0.33178679                                 | 3.99604E+23                                   | 0.1716060                   |
| 1.563 mM           | 0.5552643                                  | 6.6876E+23                                    | 0.3100822                   |
| 0.781 mM           | 0.38514569                                 | 4.63869E+23                                   | 0.1768886                   |
| 0.391mM            | 0.7840419                                  | 9.443E+23                                     | 0.14518971                  |
